# Supplementary material for: Reversible Impacts of a Cold Spell on Forest Cover, Tree Growth and Carbohydrates in Mediterranean Pine and Oak Forests
Source: MDPI journal article supplement (doi:10.3390/f14040678), 2023-03-25

## Supplementary Materials

**Figure S1.** Climate diagrams and estimated climate water balance of the Daroca and Calamocha meteorological stations.

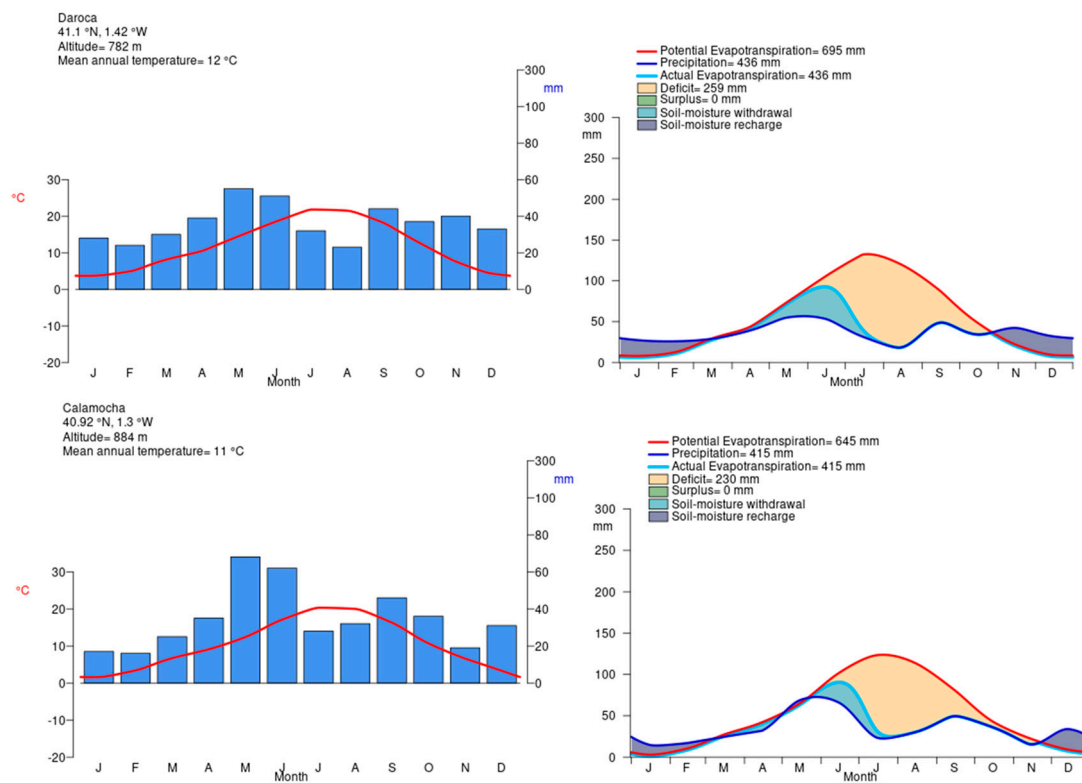

**Figure S2.** Daily means and values of minimum air temperatures recorded during the cold 2001-2002 and 2020-2021 winters in the Daroca meteorological station. Error bars are standard deviations. Means were calculated for the period 1920-2019.

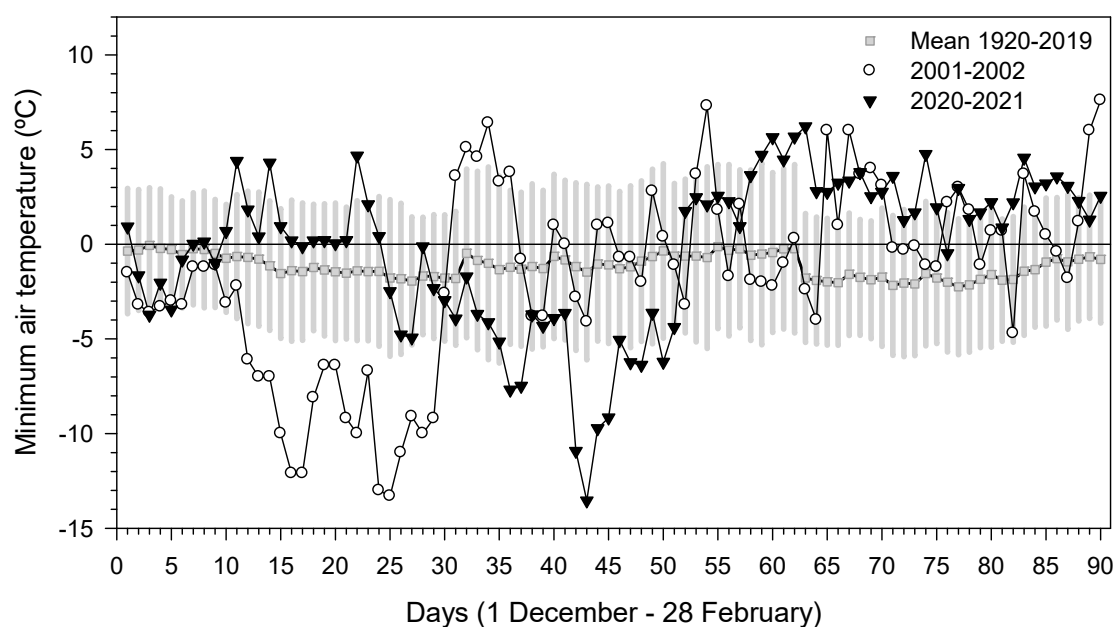

**Figure S3.** Intra-period extreme temperature range (difference between daily maximum and minimum temperatures) calculated for January 2021 in European meteorological stations. Note that some of the highest values of this range were recorded in the study area located in northeastern Spain (the symbol with a dot corresponds to the Daroca meteorological station). Data were obtained from the European Climate Assessment and Dataset available at <https://www.ecad.eu/>.

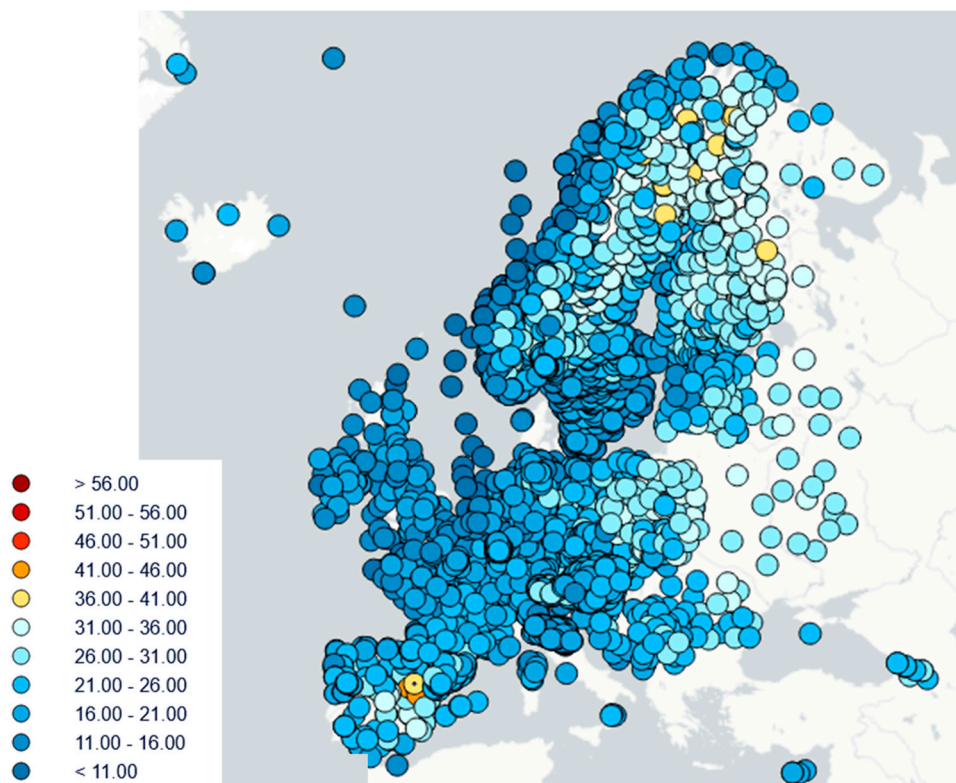

Supplement: s1 [file s1]
